# Supplementary material for: Supramolecular architectures based on various macrocyclic metallic tectons with 1,3,5-triazine-2,4,6-triamine hexaacetic acid ligand
Source: Royal Society of Chemistry journal article supplement (doi:10.1039/c2ce06494d), 2012-01-01
Supplement: c2ce06494d.pdf [file c2ce06494d.pdf]

Supporting Information for

**Supramolecular architectures based on various macrocyclic metallic tectons with**

**1,3,5-triazine-2,4,6-triamine hexaacetic acid ligand**

Xiang Jiang, Bo Tao, Hua Xia\*, Gui-ying Liao\*

Email: Hua Xia\* [caihua223@gmail.com](mailto:caihua223@gmail.com)    Gui-ying Liao\* [283451382@qq.com](mailto:283451382@qq.com)

*Faculty of Material Science and Chemistry Engineering, China University of Geosciences, Wuhan,*

*430074 People's Republic of China*

**Supporting Information Table 1:** Selected bond lengths (Å) and angles (°) for the compound 4-12.

| Compound 4              |              | Compound 5               |             | Compound 6               |             |
|-------------------------|--------------|--------------------------|-------------|--------------------------|-------------|
| Cu(1)-N(4)              | 1.9976(18)   | N(1)-Ni                  | 1.915(2)    | N(1)-Ni(1)               | 1.912(3)    |
| Cu(1)-N(2)              | 2.0073(18)   | N(2)-Ni                  | 1.9406(18)  | N(2)-Ni(1)               | 1.937(3)    |
| Cu(1)-N(1)              | 2.0111(18)   | N(3)-Ni                  | 1.911(2)    | N(3)-Ni(1)               | 1.916(3)    |
| Cu(1)-N(3)              | 2.0183(19)   | N(4)-Ni                  | 1.9322(18)  | N(4)-Ni(1)               | 1.940(3)    |
| N(4)-Cu(1)-N(2)         | 176.91(8)    | O(1)-Ni                  | 3.2220(15)  | O(1)-Ni(1)               | 3.2089(33)  |
| N(4)-Cu(1)-N(1)         | 86.57(7)     | O(11)-Ni                 | 2.9639(15)  | O(4)-Ni(1)               | 2.9563(32)  |
| N(2)-Cu(1)-N(1)         | 92.21(8)     | N(1)-Ni-N(2)             | 93.37(9)    | N(3)-Ni(1)-N(4)          | 93.44(14)   |
| N(4)-Cu(1)-N(3)         | 95.07(8)     | N(4)-Ni-N(2)             | 178.44(7)   | N(2)-Ni(1)-N(4)          | 178.36(13)  |
| N(2)-Cu(1)-N(3)         | 86.56(8)     | N(3)-Ni-N(1)             | 179.42(8)   | N(1)-Ni(1)-N(3)          | 179.50(14)  |
| N(1)-Cu(1)-N(3)         | 171.37(8)    | N(3)-Ni-N(4)             | 93.06(10)   | N(1)-Ni(1)-N(2)          | 93.16(16)   |
|                         |              | N(1)-Ni-N(4)             | 86.78(9)    | N(3)-Ni(1)-N(2)          | 86.53(15)   |
|                         |              | N(3)-Ni-N(2)             | 86.77(9)    | N(1)-Ni(1)-N(4)          | 86.86(15)   |
|                         |              | O(1)-Ni-O(11)            | 176.657     | O(1)-Ni(1)-O(4)          | 176.676(82) |
| Compound 7 <sup>a</sup> |              | Compound 8               |             | Compound 9               |             |
| N(1)-Ni(1)              | 1.927(6)     | N(7)-Ni(1)               | 1.921(3)    | Cu(1)-N(4)               | 2.007(4)    |
| N(2)-Ni(1)              | 1.939(6)     | N(8)-Ni(1)               | 1.931(3)    | Cu(1)-N(2)               | 2.009(4)    |
| Ni(1)-N(1)#1            | 1.927(6)     | N(9)-Ni(1)               | 1.938(3)    | Cu(1)-N(3)               | 2.015(4)    |
| Ni(1)-N(2)#1            | 1.939(6)     | N(10)-Ni(1)              | 1.910(3)    | Cu(1)-N(1)               | 2.018(4)    |
| Ni(1)-O6                | 3.0189(5)    | O(1)-Ni(1)               | 2.6897(23)  | Cu(1)-O(12)              | 2.373(3)    |
| Ni(1)-O6#1              | 3.0189(5)    | O(4)-Ni(1)               | 3.0488(28)  | N(4)-Cu(1)-N(2)          | 177.23(19)  |
| N(1)-Ni(1)-N(1)#1       | 86.4(4)      | N(10)-Ni(1)-N(7)         | 87.84(14)   | N(4)-Cu(1)-N(3)          | 86.16(19)   |
| N(1)-Ni(1)-N(2)#1       | 175.0(2)     | N(10)-Ni(1)-N(8)         | 176.22(12)  | N(2)-Cu(1)-N(3)          | 96.05(19)   |
| N(1)#1-Ni(1)-N(2)#1     | 93.3(3)      | N(7)-Ni(1)-N(8)          | 94.57(13)   | N(4)-Cu(1)-N(1)          | 92.0(2)     |
| N(1)-Ni(1)-N(2)         | 93.3(3)      | N(10)-Ni(1)-N(9)         | 92.75(14)   | N(2)-Cu(1)-N(1)          | 85.5(2)     |
| N(1)#1-Ni(1)-N(2)       | 175.0(2)     | N(7)-Ni(1)-N(9)          | 172.67(11)  | N(3)-Cu(1)-N(1)          | 166.92(16)  |
| N(2)#1-Ni(1)-N(2)       | 87.4(3)      | N(8)-Ni(1)-N(9)          | 85.24(13)   | N(4)-Cu(1)-O(12)         | 94.59(14)   |
| O(6)-Ni(1)-O6#1         | 146.407(117) | O(1)-Ni-O(4)             | 157.494     | N(2)-Cu(1)-O(12)         | 86.53(13)   |
|                         |              |                          |             | N(3)-Cu(1)-O(12)         | 103.32(14)  |
|                         |              |                          |             | N(1)-Cu(1)-O(12)         | 89.73(13)   |
| Compound 10             |              | Compound 11 <sup>b</sup> |             | Compound 12 <sup>c</sup> |             |
| N(1)-Ni(1)              | 1.930(3)     | Ni(1)-N(1)               | 1.923(4)    | Ni(1)-N(1)               | 1.927(4)    |
| N(2)-Ni(1)              | 1.923(3)     | Ni(1)-N(1)#1             | 1.923(4)    | Ni(1)-N(1)#1             | 1.927(4)    |
| N(3)-Ni(1)              | 1.926(3)     | Ni(1)-N(3)#1             | 1.932(4)    | Ni(1)-N(3)               | 1.929(4)    |
| N(4)-Ni(1)              | 1.937(3)     | Ni(1)-N(3)               | 1.932(4)    | Ni(1)-N(3)#1             | 1.929(4)    |
| O(6)-Ni(1)              | 3.0017(36)   | Ni(1)-O(5)               | 2.9372(33)  | Ni(1)-O(5)               | 2.9476(33)  |
| O(7)-Ni(1)              | 3.0698(36)   | Ni(1)-O(5)#1             | 2.9372(33)  | Ni(1)-O(5)#1             | 2.9476(33)  |
| N(2)-Ni(1)-N(3)         | 87.29(11)    | N(1)#1-Ni(1)-N(1)        | 87.0(3)     | N(1)-Ni(1)-N(1)#1        | 86.4(3)     |
| N(2)-Ni(1)-N(1)         | 93.43(12)    | N(1)#1-Ni(1)-N(3)#1      | 93.01(18)   | N(1)-Ni(1)-N(3)          | 93.27(18)   |
| N(3)-Ni(1)-N(1)         | 173.66(11)   | N(1)#1-Ni(1)-N(3)#1      | 174.27(17)  | N(1)#1-Ni(1)-N(3)        | 174.04(15)  |
| N(2)-Ni(1)-N(4)         | 174.85(11)   | N(1)-Ni(1)-N(3)          | 174.27(17)  | N(1)-Ni(1)-N(3)#1        | 174.04(15)  |
| N(3)-Ni(1)-N(4)         | 93.00(12)    | N(1)-Ni(1)-N(3)          | 93.01(18)   | N(1)#1-Ni(1)-N(3)#1      | 93.27(18)   |
| N(1)-Ni(1)-N(4)         | 86.86(13)    | N(3)#1-Ni(1)-N(3)        | 87.6(2)     | N(3)-Ni(1)-N(3)#1        | 87.7(2)     |
| O(6)-Ni(1)-O(7)         | 151.119      | O(5)-Ni(1)-O(5)#1        | 152.278(87) | O(5)-Ni(1)-O(5)#1        | 150.435     |

Symmetry transformations used to generate equivalent atoms:

a: #1 -x+1,y,-z+3/2    b: #1 -x+1,y,-z+1/2    c: #1 -x,y,-z+3/2

**Supporting Information Table 2:** Selected hydrogen bond Geometry lengths (Å) and angles (°) for the compounds.

| Compounds | D-H...A    | <i>d</i> (D-H) | <i>d</i> (H...A) | <i>d</i> (D...A) | ∠D-H...A |
|-----------|------------|----------------|------------------|------------------|----------|
| <b>5</b>  | N3-H...O3  | 0.912          | 1.922            | 2.831            | 174.7    |
|           | N1-H...O9  | 0.858          | 2.003            | 2.856            | 172.8    |
| <b>7</b>  | N1-H...O4  | 0.859          | 2.193            | 2.979            | 152.1    |
| <b>8</b>  | N8-H...O7  | 1.019          | 2.262            | 3.211            | 154.3    |
|           | N9-H...O4  | 0.918          | 2.309            | 3.145            | 151.3    |
| <b>9</b>  | N1-H...O9  | 0.850          | 2.306            | 3.052            | 146.1    |
| <b>10</b> | N1-H...O1  | 0.896          | 2.369            | 3.142            | 144.6    |
|           | N4-H...O10 | 0.892          | 2.203            | 3.061            | 161.2    |
| <b>12</b> | N1-H...O4  | 0.910          | 2.091            | 2.939            | 154.7    |
